# Supplementary material for: PhylOTU: A High-Throughput Procedure Quantifies Microbial Community Diversity and Resolves Novel Taxa from Metagenomic Data
Source: PubMed Central journal article supplement (PMC3024254; doi:10.1371/journal.pcbi.1001061), 2011-01-20
Supplement: pcbi.1001061.s001.pdf [file pcbi.1001061.s001.pdf]

# Sample I

Pr = 0.3

Full-Length **A B** **C D E**

Simulated **A B C** **D** **E**

Conjoined

Disjoined

**A B**

C D

C E

D E

A C

**A D**

**A E**

B C

**B D**

**B E**

# Sample II

Pr = 0.7

Full-Length **C D F G** **H**

Simulated **C** **D F G** **H**

Conjoined

Disjoined

C D

C F

C G

**D F**

**D G**

**F G**

**C H**

**D H**

**F H**

**G H**
