# Supplementary material for: PhylOTU: A High-Throughput Procedure Quantifies Microbial Community Diversity and Resolves Novel Taxa from Metagenomic Data
Source: PubMed Central journal article supplement (PMC3024254; doi:10.1371/journal.pcbi.1001061), 2011-01-20

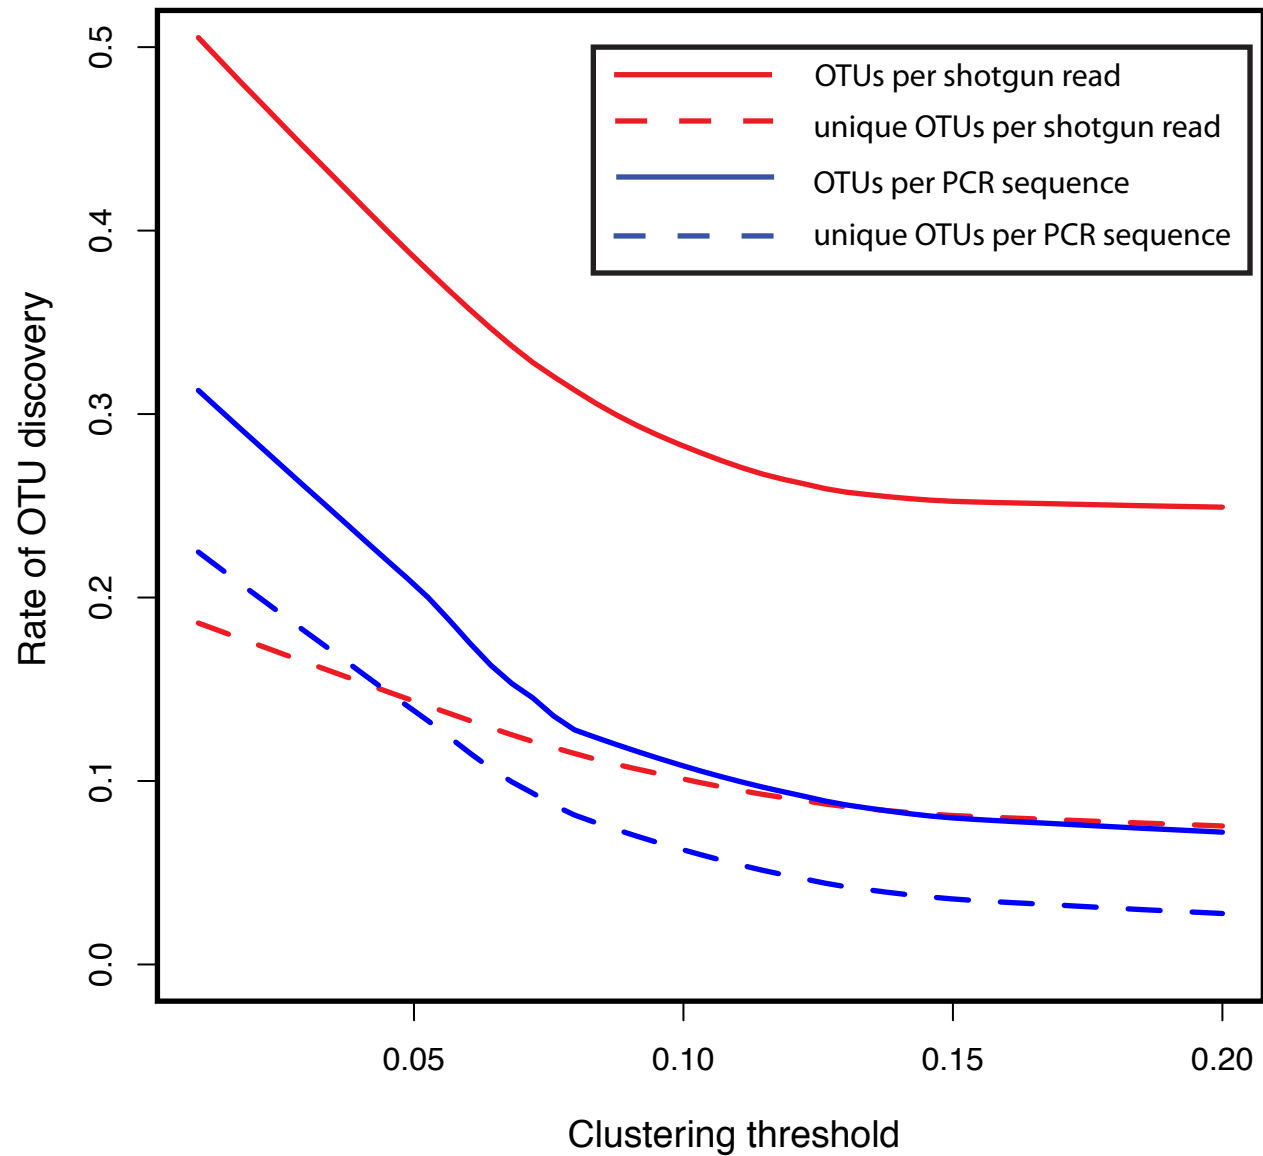

Supplement: pcbi.1001061.s009.pdf [file pcbi.1001061.s009.pdf]
