# Supplementary material for: PhylOTU: A High-Throughput Procedure Quantifies Microbial Community Diversity and Resolves Novel Taxa from Metagenomic Data
Source: PubMed Central journal article supplement (PMC3024254; doi:10.1371/journal.pcbi.1001061), 2011-01-20
Supplement: pcbi.1001061.s010.pdf [file pcbi.1001061.s010.pdf]

# STOCKHOLM 1.0  
#=GF AU Infernal 1.0.2

JCVI\_READ\_1092215016641 -----AGTTTGAT**T**ATGGCTCAGAACGAACGCTGGCGGCATGCCTC  
JCVI\_READ\_1092351640238 -----AGAGTTTGAT**T**CTGGCTCAGGACGAACGCTGGCGGCCTGCTTA  
JCVI\_READ\_1095335017447 -----GAGTTTGAT**C**ATGGCTCAGAACGTACGCTGGCGGCACGCCTA  
JCVI\_READ\_1095328034289 -----GAGAGTTTGAT**C**CTGGCTCACGACGAACGCTGGCGGCCTGCTTT  
JCVI\_READ\_1091141016470 -----AGAGTTTGAT**C**CTGGCTCAGGATGAACGCTAGCGGCAGGCTTA  
JCVI\_READ\_1091141014166 -----AGAGTTTGAT**C**CTGGCTCAGGATGAACGCTAGCGGCAGGCTTA  
8F\_Turner99 -----AGAGTTTGAT**C**CTGGCTCAG-----  
27F\_Lane91 -----AGAGTTTGAT**C**MTGGCTCAG-----  
#=GC SS\_cons ::::::::::<<<<<\_\_\_\_\_>>>>, {{{{-{{{{{{, {{{{{{{{{{{---  
#=GC RF tAAAtGGAGAGTTTGAT**C**CTGGCTCAGaATGAACGCTGGCGGCgtGCCTA
